# Supplementary material for: Polymer hybrid thin films based on rare earth ion-functionalized MOF: photoluminescence tuning and sensing as a thermometer
Source: Royal Society of Chemistry journal article supplement (doi:10.1039/c4dt03213f), 2014-11-19
Supplement: c4dt03213f1.pdf [file c4dt03213f1.pdf]

## Electronic Supporting Information

### Polymer hybrid thin films based on rare earth ion- functionalized MOF: photoluminescence tuning and sensing as temperature thermometer

Xiang Shen, Bing Yan\*

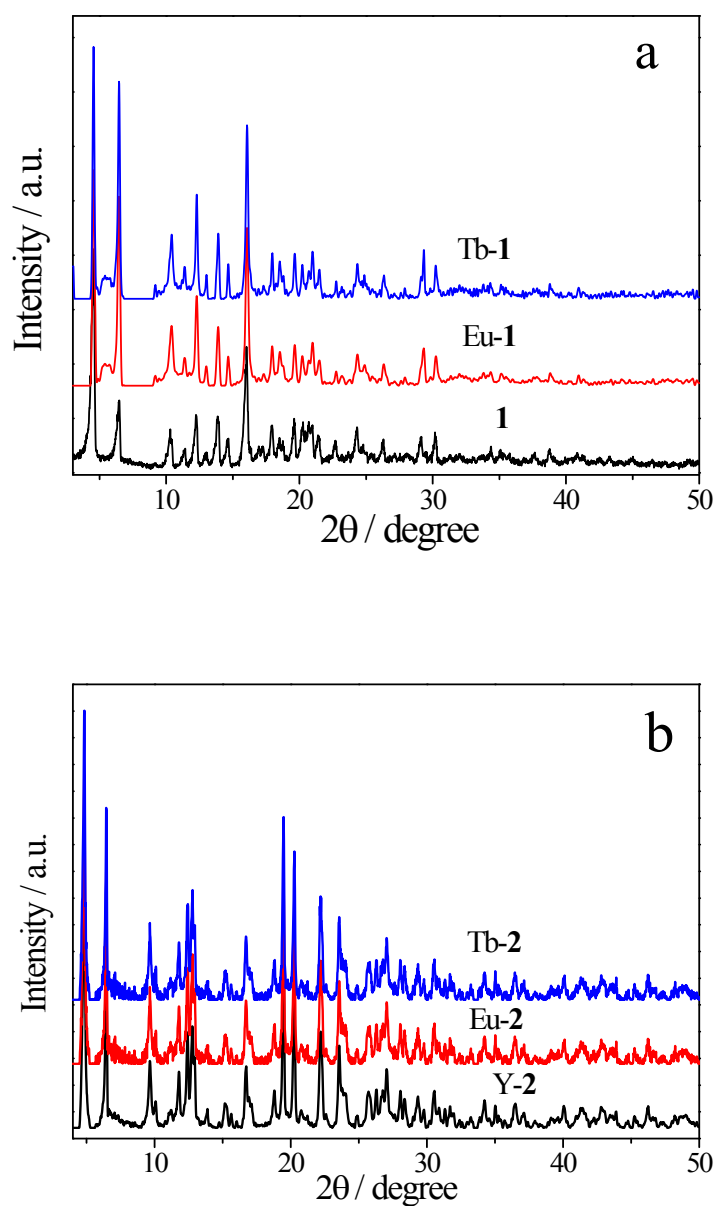

**Figure S1** PXRD patterns of **1** and RE- **1** (a), Y-**2** and RE-**2**(b) powder samples

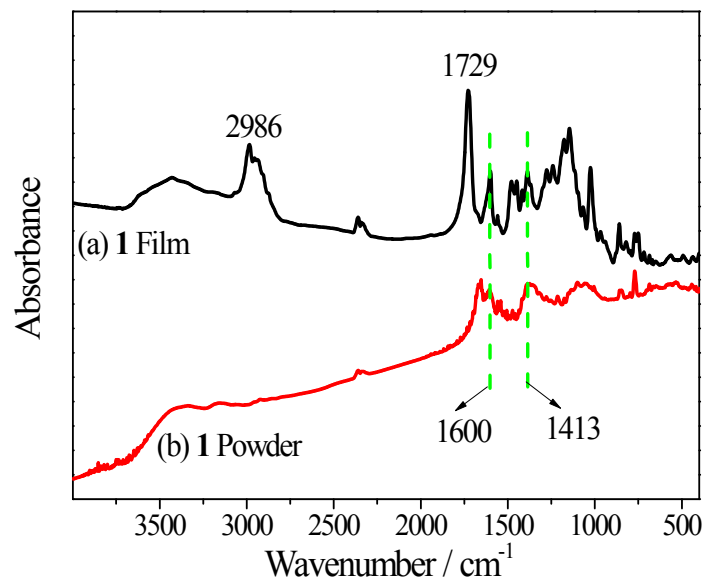

**Figure S2** FT-IR spectrum of **1** thin film (a) and powder (b)

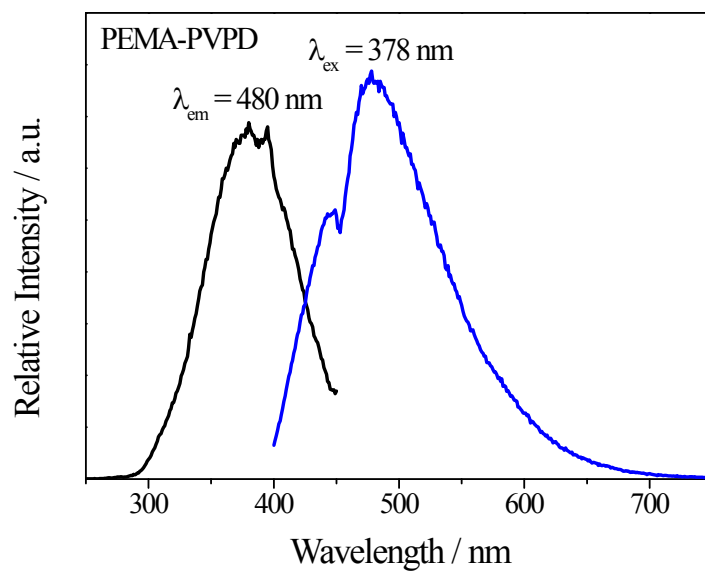

**Figure S3** The excitation (black) and emission (blue) spectra of pure PEMA-PVPD ( $\lambda_{\text{ex}} = 378$  nm,  $\lambda_{\text{em}} = 480$  nm)

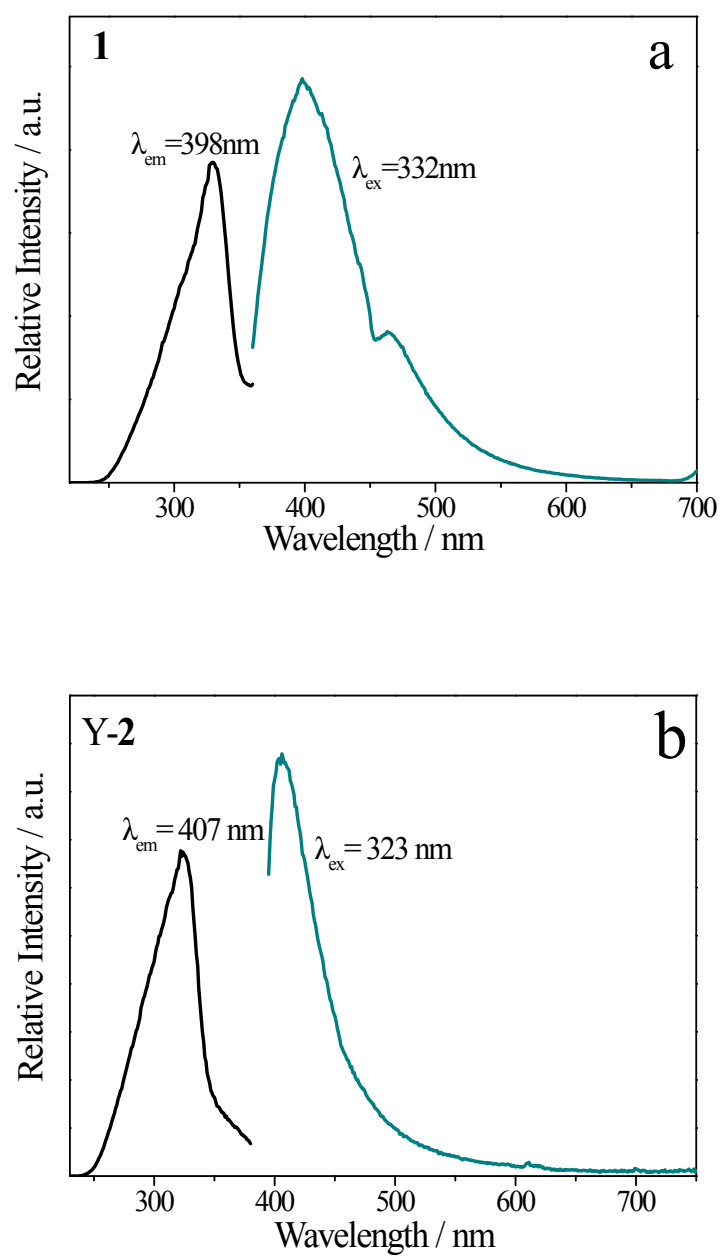

**Figure S4** The excitation (black) and emission (dark cyan) spectra of **1** ( $\lambda_{ex} = 332\text{ nm}$ ,  $\lambda_{em} = 398\text{ nm}$ ) (a) and **Y-2** ( $\lambda_{ex} = 323\text{ nm}$ ,  $\lambda_{em} = 407\text{ nm}$ ) (b) powders

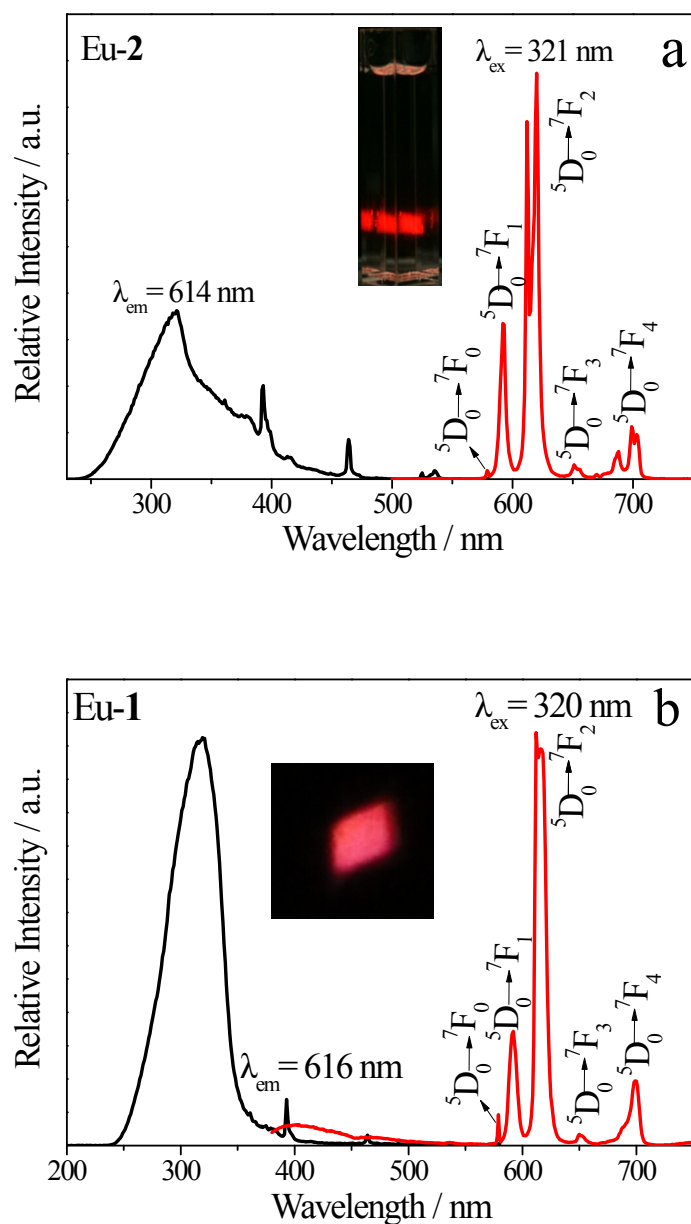

**Figure S5** The excitation (black) and emission (red) spectra of Eu- 2 ( $\lambda_{ex} = 321$  nm,  $\lambda_{em} = 614$  nm) (a) and Eu-1 ( $\lambda_{ex} = 320$  nm,  $\lambda_{em} = 616$  nm) (b) powder samples; the insets are photographs of (a) and (b) displaying red colors under Xe lamp.

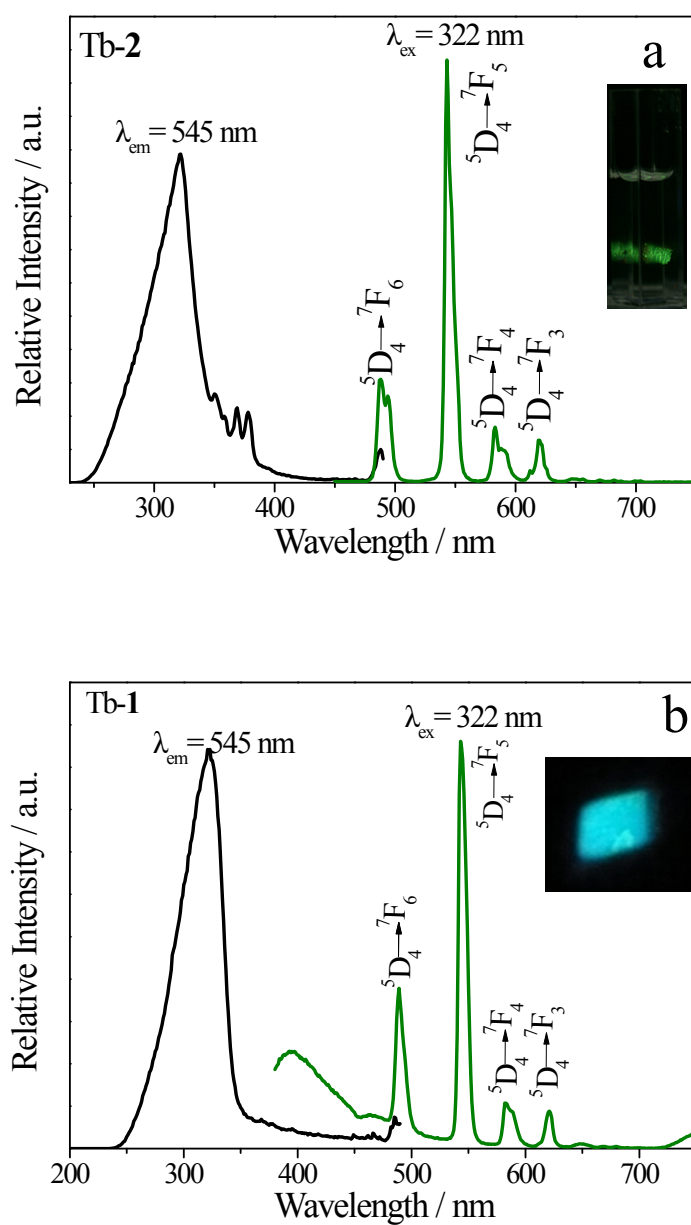

**Figure S6** The excitation (black) and emission (green) spectra and photographs of Tb-2 ( $\lambda_{ex} = 322$  nm,  $\lambda_{em} = 545$  nm) (a) and Tb-1 ( $\lambda_{ex} = 322$  nm,  $\lambda_{em} = 545$  nm) (b) powder samples

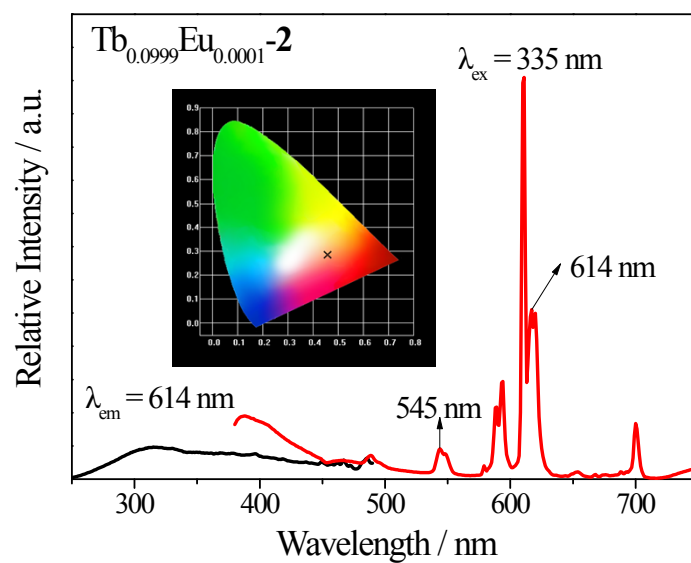

**Figure S7** The excitation ( $\lambda_{\text{ex}} = 335$  nm) and emission ( $\lambda_{\text{em}} = 614$  nm) spectra of  $\text{Tb}_{0.0999}\text{Eu}_{0.0001}\text{-2}$  powder and the inset is its CIE chromaticity diagram ( $x = 0.4473$ ,  $y = 0.2797$ )

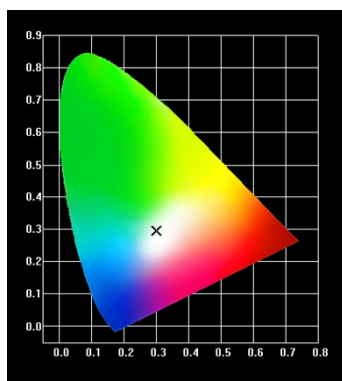

**Figure S8** The CIE chromaticity diagram of  $\text{Tb}_{0.0999}\text{Eu}_{0.0001}\text{-2}$  thin film showing the color is white ( $x = 0.3$ ,  $y = 0.2951$ )

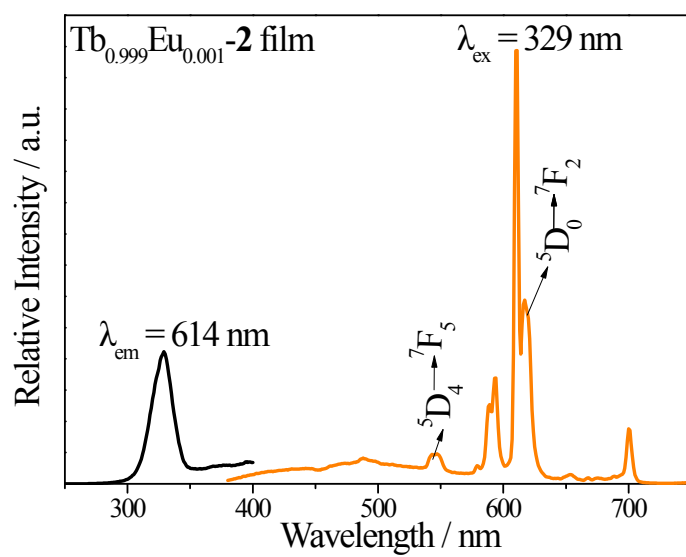

**Figure S9** The excitation ( $\lambda_{\text{ex}} = 329 \text{ nm}$ ) and emission ( $\lambda_{\text{em}} = 614 \text{ nm}$ ) spectra of Tb<sub>0.999</sub>Eu<sub>0.001</sub>-2 powder

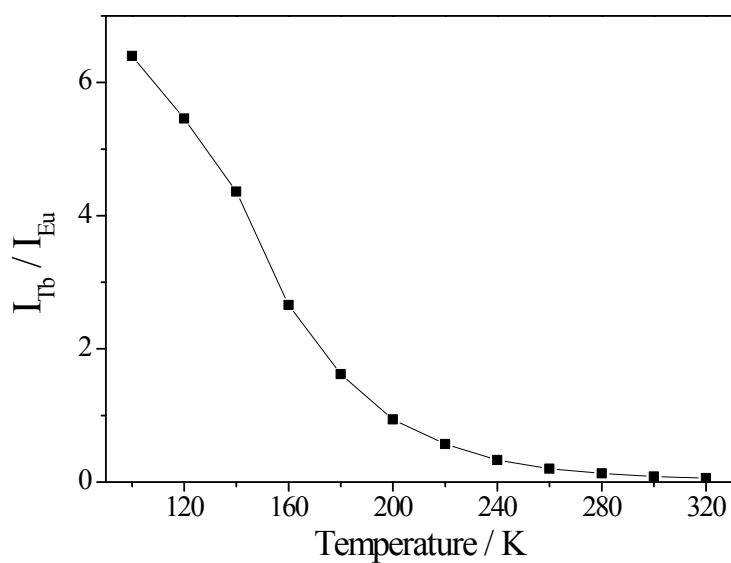

**Figure S10** The original fitted curve of the intensity ratio ( $I_{\text{Tb}}/I_{\text{Eu}}$ ) for Tb<sub>0.999</sub>Eu<sub>0.001</sub>-2 thin film from 100 to 320 K

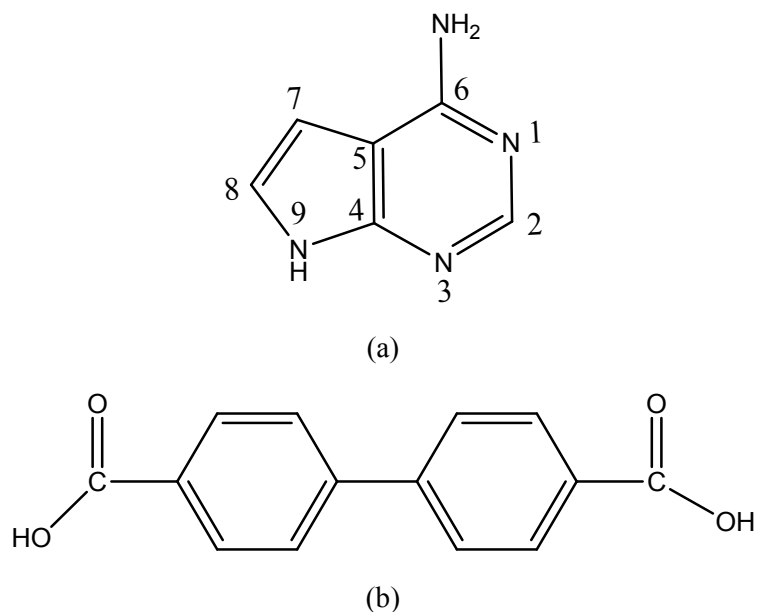

**Figure S11** The chemical structures of adenine (a) and biphenyl-4,4'-dicarboxylic acid (b)

**Table S1** The luminescence data of polymer thin films

| Materials (thin films)                       | $\lambda_{\text{ex}}$ (nm) | $\lambda_{\text{em}}$ (nm) | Color (CIE-X,Y)                | $\eta$ (%) | $\tau$ ( $\mu$ s)       |
|----------------------------------------------|----------------------------|----------------------------|--------------------------------|------------|-------------------------|
| 2                                            | 371                        | 445                        | Blue<br>(0.1975, 0.2739)       | 42.0       |                         |
| Eu-2                                         | 322                        | 614                        | Red<br>(0.4408, 0.2972)        | 16.7       | 1229                    |
| Tb-2                                         | 321                        | 545                        | Green<br>(0.2848, 0.4795)      | 14.6       | 385                     |
| 1                                            | 351                        | 468                        | Blue<br>(0.2094, 0.2879)       | 28.8       |                         |
| Eu-1                                         | 317                        | 616                        | Red<br>(0.4713, 0.2874)        | 16.0       |                         |
| Tb-1                                         | 300                        | 545                        | Blue-green<br>(0.2336, 0.3722) | 13.2       |                         |
| Tb <sub>0.0999</sub> Eu <sub>0.0001</sub> -2 | 329                        | 614                        | White<br>(0.3, 0.2951)         | 9.5        |                         |
| Tb <sub>0.999</sub> Eu <sub>0.001</sub> -2   | 329                        | 614                        | Pink<br>(0.3701, 0.2467)       | 27.3       | 1322 (614)<br>270 (545) |

$\eta$ - the emission quantum efficiency

$\tau$ - luminescence lifetime
